# Supplementary material for: Mitochondriomics of Clarias Fishes (Siluriformes: Clariidae) with a New Assembly of Clarias camerunensis: Insights into the Genetic Characterization and Diversification
Source: MDPI journal article supplement (doi:10.3390/life13020482), 2023-02-09
Supplement: s1 [file s1]

**Supplementary File (s)**

**Table S1.** List of designed primer pairs used for the long PCR to assemble *C. camerunensis* mitogenome.

| <b>Primer Code</b> | <b>Sequence (5'-3')</b>   | <b>Annealing Temp. (°C)</b> |
|--------------------|---------------------------|-----------------------------|
| C1C3_F1            | CTAGRTRRGAAGGCCTCGATCC    | 63.7                        |
| C1C3_R1            | GTCARTATCADGCAGCKGCTTC    | 60.6                        |
| C1C3_R2            | GCAGCKGCTTCRAAKCCRAAGTG   | 65.4                        |
| C3ND6_F1           | CGTCTAATGGCCCACCAAGC      | 64.0                        |
| C3ND6_R1           | GCTGGDGTGDDTGTGG          | 62.7                        |
| ND6D1_F1           | GAGGAAGYATHATTGCAGG       | 54.8                        |
| ND6D1_R1           | GGAACCAGATGCCAGTAATAG     | 57.2                        |
| D112S_F1           | GAATCGGCGGMATAACWGTAG     | 61.3                        |
| D112S_R1           | GCACCTTCCGGTACACTTAC      | 60.5                        |
| D2ND1_F2           | GCATCTGGTTCCTATTTCAGG     | 58.1                        |
| D2ND1_R1           | CACTCTATCAAAGTGGYCC       | 56.5                        |
| 16SC1_F1           | CGTAACAHHGTAAGTGTAACGG    | 59.1                        |
| 16SC1_R1           | CCTGTTGGAATTGCRATRATTATTG | 56.5                        |
| 16SC1_R2           | GGAATTGCRATRATTATTGTDGC   | 54.5                        |

**Table S2.** The mitogenomes of *Clarias* species used in the present analyses.

| Sl. No. | Species and Code                                        | Known Distribution                                                                                                                                                                                                                                                                                                                                                                                                                     | Accession No. | Size (bP) |
|---------|---------------------------------------------------------|----------------------------------------------------------------------------------------------------------------------------------------------------------------------------------------------------------------------------------------------------------------------------------------------------------------------------------------------------------------------------------------------------------------------------------------|---------------|-----------|
| 1       | <i>Clarias camerunensis</i><br>Lönnberg, 1895<br>(CC)   | Angola, Benin, Cameroon, Central African Republic, Congo, The Democratic Republic of the Congo, Equatorial Guinea, Gabon, Ghana, Nigeria, South Sudan, and Togo                                                                                                                                                                                                                                                                        | OP936082      | 16,511    |
| 2       | <i>Clarias batrachus</i><br>(Linnaeus, 1758)            | Indonesia (Java)                                                                                                                                                                                                                                                                                                                                                                                                                       | KY767672      | 16,496    |
| 3       | (CB)                                                    |                                                                                                                                                                                                                                                                                                                                                                                                                                        | KM259918      | 16,510    |
| 4       | (CB)                                                    |                                                                                                                                                                                                                                                                                                                                                                                                                                        | KC572134      | 16,511    |
| 5       | <i>Clarias dussumieri</i><br>Valenciennes, 1840<br>(CD) | India (Tamil Nadu, Goa, Kerala, Karnataka, Pondicherry)                                                                                                                                                                                                                                                                                                                                                                                | MG644387      | 16,514    |
| 6       | <i>Clarias fuscus</i><br>(Lacepède, 1803)               | China, Hong Kong, Laos, Taiwan, and Viet Nam                                                                                                                                                                                                                                                                                                                                                                                           | KJ819540      | 16,507    |
| 7       | (CF)                                                    |                                                                                                                                                                                                                                                                                                                                                                                                                                        | KF188424      | 16,518    |
| 8       | (CF)                                                    |                                                                                                                                                                                                                                                                                                                                                                                                                                        | KM029965      | 16,525    |
| 9       | <i>Clarias gariepinus</i><br>(Burchell, 1822)           | Algeria, Angola, Benin, Botswana, Burkina Faso, Burundi, Cameroon, Central African Republic, Chad, Congo, The Democratic Republic of the Congo, Egypt, Eritrea, Eswatini, Ethiopia, Ghana, Guinea, Israel, Jordan, Kenya, Lebanon, Liberia, Libya, Malawi, Mozambique, Namibia, Niger, Nigeria, Rwanda, Senegal, Somalia, South Africa, South Sudan, Sudan, Syrian Arab Republic, Tanzania, Togo, Turkey, Uganda, Zambia, and Zimbabwe | KT809508      | 16,505    |
| 10      | (CG)                                                    |                                                                                                                                                                                                                                                                                                                                                                                                                                        | KT001082      | 16,508    |
| 11      | <i>Clarias macrocephalus</i><br>Günther, 1864<br>(CM)   | Cambodia, Laos, Malaysia, Thailand, and Viet Nam                                                                                                                                                                                                                                                                                                                                                                                       | MT109097      | 16,511    |
| 12      | <i>Clarias</i> sp.<br>(CS)                              | -                                                                                                                                                                                                                                                                                                                                                                                                                                      | AP012010      | 16,508    |
| 13      | <i>Heteropneustes fossilis</i><br>(Bloch, 1794)         | -                                                                                                                                                                                                                                                                                                                                                                                                                                      | AP012013      | 16,489    |

**Table S3.** Comparison of the intergenic nucleotides of the studied *Clarias* species.

[illegible]



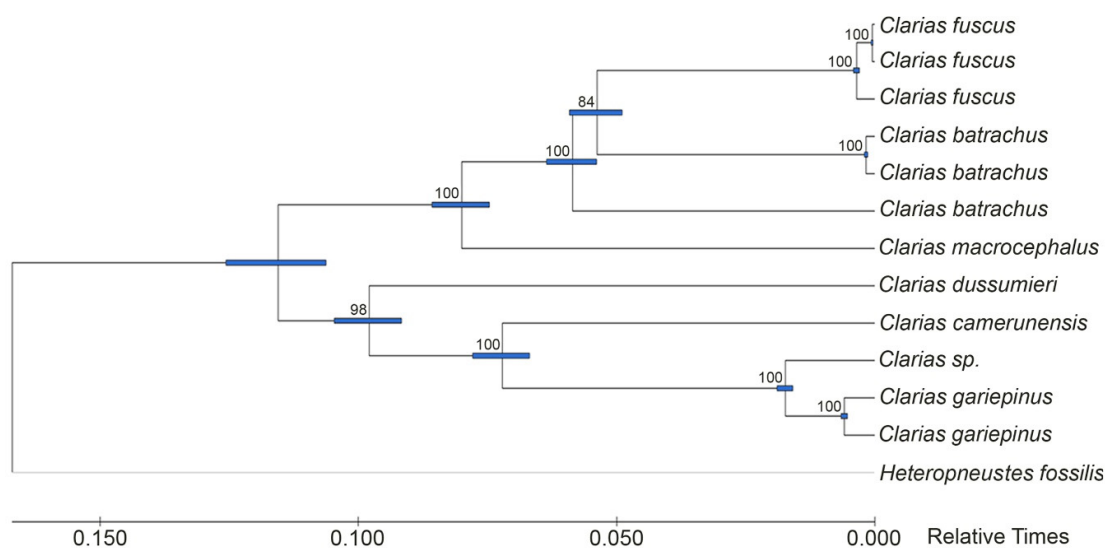

**Figure S1.** The maximum-likelihood topology with relative times showed the divergence rate of the *Clarias* species. Bootstrap values were superimposed with each node.
